# Supplementary material for: Mental and Physical Symptoms and Perceived Health Risks of Pregnant and Postpartum Women following the Significant Shift in COVID-19 Management in China: A Cross-Sectional Survey
Source: Hindawi journal article supplement (doi:10.1155/2024/8657486), 2024-03-06
Supplement: f1 [file 8657486.f1.docx]

Supplemental table 1 Results of hierarchical regression analyses for **hopelessness**

| **Variables** | **Overall**  **(N=1013)**  **(n, %)** | **Cases**  **(n=311, 30.2%)**  **[n, (%)]** | **Model 1** | **Model 2** | **Model 3** | **Model 4** |
| --- | --- | --- | --- | --- | --- | --- |
| **Age** years | 32.0 (0.30) | 32.0 (0.28) | 1.07 (0.64-1.69) | 1.07 (0.65-1.68) | 1.06 (0.62-1.67) | 1.05 (0.63-1.66) |
| **Weight (kg)** | 62.3 (8.56) | 61.9 (8.42) | 0.99 (0.97-1.00) | 0.99 (0.97-1.00) | 0.99 (0.97-1.00) | 0.99 (0.97-1.00) |
| **Pregnancy and childbirth status** |  |  |  |  |  |  |
| Pregnant (36 weeks or less) | 491 (48.5%) | 135 (43.4%) | Ref | Ref | Ref | Ref |
| Pregnant (> 36 weeks) | 206 (20.3%) | 72 (23.2%) | 1.41 (0.97-2.04) | 1.30 (0.89-1.89) | 1.42 (0.97-2.08) | 1.31 (0.89-1.92) |
| Postpartum (42 days or less) | 132 (13.0%) | 51 (16.4%) | **1.62 (1.05-2.46) *** | 1.51 (0.98-2.30) | **1.56 (1.01-2.38)*** | 1.45 (0.94-2.23) |
| Postpartum(> 42 days) | 184 (18.2%) | 53 (17.0%) | 0.98 (0.66-1.46) | 0.91 (0.61-1.36) | 0.98 (0.65-1.45) | 0.91 (0.60-1.36) |
| **Number of child(ren)** |  |  |  |  |  |  |
| One | 662 (65.4%) | 196 (63.0%) | Ref | Ref | Ref | Ref |
| Two or more | 351 (34.6%) | 115 (37.0%) | 1.04 (0.76-1.42) | 1.02 (0.74-1.39) | 1.02 (0.75-1.39) | 1.00 (0.73-1.36) |
| **Monthly family income (CNY)** |  |  |  |  |  |  |
| 5,000-10,000 | 440 (43.4%) | 133 (42.8%) | Ref | Ref | Ref | Ref |
| <5,000 | 239 (23.6%) | 87 (28.0%) | 1.43 (0.96-2.11) | **1.52 (1.02-2.25)*** | **1.50 (1.01-2.23)*** | **1.59 (1.07-2.37)*** |
| > 10,000 | 334 (33.0%) | 91 (29.3%) | 0.76 (0.54-1.06) | 0.80 (0.57-1.12) | 0.76 (0.54-1.08) | 0.81 (0.57-1.14) |
| **Educational level** |  |  |  |  |  |  |
| Primary school or below | 47 (4.6%) | 19 (6.1%) | Ref | Ref | Ref | Ref |
| Middle school | 191 (18.9%) | 53 (17.0%) | 1.50 (0.57-4.22) | 1.43 (0.55-4.05) | 1.48 (0.56-4.19) | 1.42 (0.54-4.04) |
| College or above | 775 (76.5%) | 239 (76.8%) | 2.49 (0.92-7.20) | 2.27 (0.84-6.61) | 2.55 (0.95-7.39) | 2.34 (0.86-6.82) |
| **Employment status** |  |  |  |  |  |  |
| Unemployed | 115 (11.4%) | 50 (16.1%) | Ref | Ref | Ref | Ref |
| Other | 898 (88.6%) | 261 (83.9%) | **0.59 (0.38-0.93)*** | **0.63 (0.40-0.99)*** | **0.59 (0.38-0.94)*** | **0.63 (0.40-0.99)*** |
| **Partner’s educational level** |  |  |  |  |  |  |
| Primary school or below | 53 (5.2%) | 27 (8.7%) | Ref | Ref | Ref | Ref |
| Middle school | 183 (18.1%) | 56 (18.0%) | **0.26 (0.10-0.64)**** | **0.27 (0.10-0.66)**** | **0.25 (0.10-0.63)**** | **0.26 (0.10-0.65)**** |
| College or above | 777 (76.7%) | 228 (73.3%) | **0.18 (0.07-0.47)***** | **0.19 (0.07-0.49)***** | **0.18 (0.07-0.45)***** | **0.18 (0.07-0.47)***** |
| **Partner’s employment status** |  |  |  |  |  |  |
| Unemployed | 27 (2.7%) | 7 (2.3%) | Ref | Ref | Ref | Ref |
| Other | 986 (97.3%) | 304 (97.7%) | 2.72 (1.04-7.94) | 2.57 (0.98-7.48) | 2.69 (1.02-7.91) | 2.55 (0.97-7.46) |
| **Relationship with the partner** |  |  |  |  |  |  |
| General | 54 (5.3%) | 29 (9.3%) | Ref | Ref | Ref | Ref |
| Good | 959 (94.7%) | 282 (90.7%) | **0.52 (0.28-0.95)*** | **0.50 (0.27-0.93)*** | **0.50 (0.27-0.93)*** | **0.49 (0.27-0.91)*** |
| **Self-perceived health status** |  |  |  |  |  |  |
| General | 186 (18.4%) | 79 (25.4%) | Ref | Ref | Ref | Ref |
| Good | 813 (80.3%) | 227 (73.0%) | **0.60 (0.41-0.87)**** | **0.63 (0.44-0.92)*** | **0.60 (0.42-0.88)**** | **0.64 (0.44-0.93)*** |
| Poor | 14 (1.4%) | 5 (1.6%) | 0.77 (0.21-2.53) | 0.71 (0.19-2.37) | 0.75 (0.20-2.50) | 0.69 (0.18-2.34) |
| **Family members’ SARS-CoV-2 infection status** (Yes) | 500 (49.4%) | 190 (61.1%) |  | **2.08 (1.37-3.20)***** |  | **2.06 (1.35-3.16)***** |
| **Concerned about the impact of COVID** **infection on health** (Yes) | 549 (49.4%) | 184 (59.2%) |  |  | 1.59 (0.99-2.55) | 1.54 (0.96-2.47) |
| **Concerned about the crowding out of health care resources** (Yes) | 486 (48.0%) | 155 (49.8%) |  |  | 0.80 (0.51-1.25) | 0.83 (0.53-1.30) |
| **Prepared medication related to the SARS-CoV-2 infection in advance** (Yes) | 523 (51.6%) | 160 (51.4%) |  |  | 0.97 (0.68-1.38) | 0.96 (0.68-1.36) |
| **COVID-19 diagnosis** (Yes) | 590 (58.2%) | 202 (65.0%) | **1.69 (1.21-2.36) **** | 1.02 (0.65-1.59) | **1.50 (1.03-2.21) *** | 0.92 (0.57-1.48) |
| ***Adjusted R2*** |  |  | 0.058 | 0.068 | 0.061 | 0.070 |
| ***ΔR2*** |  |  |  | 0.01 | 0.003 | 0.012 |

Note: **p*<0.05, ***p*<0.01, ****p*<0.001 (two-tailed).

Supplemental table 2 Results of hierarchical regression analyses for **anxiety symptoms**

| **Variables** | **Overall**  **(N=1013)**  **(n, %)** | **Cases**  **(n=39, 3.8%)**  **[n, (%)]** | **Model 1** | **Model 2** | **Model 3** | **Model 4** |
| --- | --- | --- | --- | --- | --- | --- |
| **Age** years | 32.0 (0.30) | 32.0 (0.46) | 0.90 (0.29-1.72) | 0.88 (0.29-1.69) | 0.76 (0.24-1.62) | 0.76 (0.23-1.60) |
| **Weight (kg)** | 62.3 (8.56) | 61.9 (11.00) | 0.98 (0.94-1.01) | 0.98 (0.94-1.01) | 0.97 (0.94-1.01) | 0.97 (0.94-1.01) |
| **Pregnancy and childbirth status** |  |  |  |  |  |  |
| Pregnant (36 weeks or less) | 491 (48.5%) | 13 (33.3%) | Ref | Ref | Ref | Ref |
| Pregnant (> 36 weeks) | 206 (20.3%) | 5 (12.8%) | 1.00 (0.30-2.95) | 0.95 (0.28-2.79) | 1.09 (0.32-3.31) | 1.02 (0.98-3.07) |
| Postpartum (42 days or less) | 132 (13.0%) | 6 (15.4%) | 1.84 (0.57-5.37) | 1.64 (0.50-4.85) | 1.93 (0.59-5.69) | 1.69 (0.50-5.07) |
| Postpartum(> 42 days) | 184 (18.2%) | 15 (38.5%) | 1.97 (0.81-4.75) | 1.85 (0.76-4.53) | 2.06 (0.84-5.02) | 1.90 (0.77-4.69) |
| **Number of Child(ren)** |  |  |  |  |  |  |
| One | 662 (65.4%) | 29 (74.4%) | Ref | Ref | Ref | Ref |
| Two or more | 351 (34.6%) | 10 (25.6%) | 0.51 (0.21-1.18) | 0.50 (0.20-1.17) | 0.53 (0.21-1.23) | 0.53 (0.21-1.23) |
| **Monthly family income (CNY)** |  |  |  |  |  |  |
| 5,000-10,000 | 440 (43.4%) | 20 (51.3%) | Ref | Ref | Ref | Ref |
| <5,000 | 239 (23.6%) | 9 (23.1%) | 1.26 (0.45-3.28) | 1.43 (0.50-3.78) | 1.44 (0.51-3.82) | 1.57 (0.55-4.20) |
| > 10,000 | 334 (33.0%) | 10 (25.6%) | **0.30 (0.12-0.72)**** | **0.32 (0.13-0.76)*** | **0.28 (0.11-0.66)**** | **0.30 (0.11-0.71)**** |
| **Educational level** |  |  |  |  |  |  |
| Primary school or below | 47 (4.6%) | 1 (2.6%) | Ref | Ref | Ref | Ref |
| Middle school | 191 (18.9%) | 3 (7.7%) | 0.35 (0.14-18.03) | 0.31 (0.01-16.23) | 0.41 (0.01-28.51) | 0.36 (0.01-23.49) |
| College or above | 775 (76.5%) | 35 (89.7%) | 1.34 (0.06-67.08) | 1.16 (0.05-57.42) | 1.92 (0.07-133.66) | 1.60 (0.06-105.25) |
| **Employment status** |  |  |  |  |  |  |
| Unemployed | 115 (11.4%) | 6 (15.4%) | Ref | Ref | Ref | Ref |
| Other | 898 (88.6%) | 33 (84.6%) | 1.30 (0.45-4.51) | 1.41 (0.48-4.91) | 1.23 (0.41-4.41) | 1.32 (0.44-4.78) |
| **Partner’s educational level** |  |  |  |  |  |  |
| Primary school or below | 53 (5.2%) | 1 (2.6%) | Ref | Ref | Ref | Ref |
| Middle school | 183 (18.1%) | 6 (15.4%) | 1.56 (0.08-72.98) | 1.47 (0.07-69.04) | 1.45 (0.06-93.42) | 1.38 (0.06-83.76) |
| College or above | 777 (76.7%) | 32 (32.1%) | 0.96 (0.05-47.66) | 0.92 (0.05-46.01) | 0.72 (0.03-50.58) | 0.70 (0.03-46.49) |
| **Partner’s employment status** |  |  |  |  |  |  |
| Unemployed | 27 (2.7%) | 3 (7.7%) | Ref | Ref | Ref | Ref |
| Other | 986 (97.3%) | 36 (92.3%) | 0.25 (0.05-1.61) | 0.25 (0.05-1.61) | 0.31 (0.05-2.18) | 0.31 (0.05-2.16) |
| **Relationship with partner** |  |  |  |  |  |  |
| General | 54 (5.3%) | 12 (30.8%) | Ref | Ref | Ref | Ref |
| Good | 959 (94.7%) | 27 (69.2%) | **0.25 (0.10-0.63)**** | **0.24 (0.01-0.62)**** | **0.24 (0.10-0.62)**** | **0.24 (0.09-0.61)**** |
| **Self-perceived health status** |  |  |  |  |  |  |
| General | 186 (18.4%) | 23 (59.0%) | Ref | Ref | Ref | Ref |
| Good | 813 (80.3%) | 12 (30.8%) | **0.19 (0.08-0.42)***** | **0.20 (0.09-0.46)***** | **0.20 (0.09-0.45)***** | **0.22 (0.09-0.50)***** |
| Poor | 14 (1.4%) | 4 (10.3%) | 2.53 (0.53-10.65) | 2.22 (0.46-9.46) | 2.47 (0.50-10.74) | 2.21 (0.45-9.70) |
| **Family members’ SARS-CoV-2 infection status** (Yes) | 500 (49.4%) | 34 (87.2%) |  | 3.02 (0.87-13.45) |  | 2.62 (0.78-9.70) |
| **Concerned about the impact of COVID** **infection on health** (Yes) | 549 (54.2%) | 32 (82.1%) |  |  | 1.71 (0.50-6.17) | 1.57 (0.46-5.64) |
| **Concerned about the crowding out of health care resources** (Yes) | 486 (48.0%) | 30 (76.9%) |  |  | 1.62 (0.57-5.29) | 1.63 (0.58-5.29) |
| **Prepared medication related to the SARS-CoV-2 infection in advance** (Yes) | 523 (51.6%) | 27 (69.2%) |  |  | 1.43 (0.63-3.38) | 1.45 (0.64-3.43) |
| **COVID-19 diagnosis** (Yes) | 590 (58.2%) | 35 (89.7%) | **6.74 (2.29-26.0)**** | 3.09(0.72-15.4) | **4.17 (1.32-17.0)*** | 2.27 (0.55-11.1) |
| ***Adjusted R2*** |  |  | 0.272 | 0.281 | 0.288 | 0.295 |
| ***ΔR2*** |  |  |  | 0.009 | 0.016 | 0.023 |

Note: **p*<0.05, ***p*<0.01, ****p*<0.001 (two-tailed).

Supplemental table 3 Results of hierarchical regression analyses for **depressive symptoms**

| **Variables** | **Overall**  **(N=1013)**  **(n, %)** | **Cases**  **(n=39, 3.8%)**  **[n, (%)]** | **Model 1** | **Model 2** | **Model 3** | **Model 4** |
| --- | --- | --- | --- | --- | --- | --- |
| **Age** years | 32.0 (0.30) | 31.9 (0.32) | 0.48 (0.12-1.44) | 0.53 (0.14-1.47) | 0.39 (0.10-1.30) | 0.44 (0.12-1.36) |
| **Weight (kg)** | 62.3 (8.56) | 61.1 (11.70) | 0.96 (0.92-1.0005) | 0.96 (0.92-1.0001) | **0.96 (0.92-0.997)*** | **0.96 (0.92-0.997)*** |
| **Pregnancy and childbirth status** |  |  |  |  |  |  |
| Pregnant (36 weeks or less) | 491 (48.5%) | 15 (38.5%) | Ref | Ref | Ref | Ref |
| Pregnant (> 36 weeks) | 206 (20.3%) | 6 (15.4%) | 1.16 (0.39-3.16) | 1.12 (0.37-3.03) | 1.30 (0.42-3.61) | 1.24 (0.40-3.42) |
| Postpartum (42 days or less) | 132 (13.0%) | 9 (23.1%) | 2.38 (0.89-6.04) | 2.16 (0.80-5.53) | 2.50 (0.93-6.40) | 2.25 (0.82-5.85) |
| Postpartum(> 42 days) | 184 (18.2%) | 9 (23.1%) | 0.98 (0.37-2.48) | 0.97 (0.34-2.30) | 0.99 (0.37-2.50) | 0.90 (0.33-2.30) |
| **Number of Child(ren)** |  |  |  |  |  |  |
| One | 662 (65.4%) | 28 (71.8%) | Ref | Ref | Ref | Ref |
| Two or more | 351 (34.6%) | 11 (28,2%) | 0.71 (0.30-1.58) | 0.69 (0.29-1.55) | 0.71 (0.30-1.58) | 0.70 (0.29-1.57) |
| **Monthly family income (CNY)** |  |  |  |  |  |  |
| 5,000-10,000 | 440 (43.4%) | 16 (41.0%) | Ref | Ref | Ref | Ref |
| <5,000 | 239 (23.6%) | 13 (33.3%) | **2.72 (1.11-6.57)*** | **2.96 (1.19-7.27)*** | **3.11 (1.25-7.65)*** | **3.30 (1.32-8.18)**** |
| > 10,000 | 334 (33.0%) | 10 (25.6%) | 0.48 (0.19-1.12) | 0.50 (0.20-1.19) | 0.42 (0.17-1.01) | 0.44 (0.18-1.07) |
| **Educational level** |  |  |  |  |  |  |
| Primary school or below | 47 (4.6%) | 2 (5.1%) | Ref | Ref | Ref | Ref |
| Middle school | 191 (18.9%) | 2 (5.1%) | 0.29 (0.02-5.50) | 0.27 (0.01-5.28) | 0.29 (0.01-6.52) | 0.26 (0.01-5.90) |
| College or above | 775 (76.5%) | 35 (89.7%) | 1.58 (0.12-27.08) | 1.39 (0.10-24.11) | 1.93 (0.13-40.06) | 1.68 (0.11-34.11) |
| **Employment status** |  |  |  |  |  |  |
| Unemployed | 115 (11.4%) | 5 (12.8%) | Ref | Ref | Ref | Ref |
| Other | 898 (88.6%) | 34 (87.2%) | 1.38 (0.48-4.82) | 1.48 (0.51-5.22) | 1.37 (0.47-4.99) | 1.47 (0.50-5.35) |
| **Partner’s educational level** |  |  |  |  |  |  |
| Primary school or below | 53 (5.2%) | 2 (5.1%) | Ref | Ref | Ref | Ref |
| Middle school | 183 (18.1%) | 4 (10.3%) | 0.89 (0.07-14.61) | 0.93 (0.07-15.66) | 0.81 (0.06-16.04) | 0.86 (0.06-16.67) |
| College or above | 777 (76.7%) | 33 (84.6%) | 0.84 (0.08-14.70) | 0.87 (0.08-15.90) | 0.65 (0.05-14.13) | 0.68 (0.05-14.75) |
| **Partner’s employment status** |  |  |  |  |  |  |
| Unemployed | 27 (2.7%) | 2 (5.1%) | Ref | Ref | Ref | Ref |
| Other | 986 (97.3%) | 37 (94.9%) | 0.40 (0.08-3.28) | 0.39 (0.07-3.15) | 0.46 (0.08-4.20) | 0.45 (0.08-4.01) |
| **Relationship with partner** |  |  |  |  |  |  |
| General | 54 (5.3%) | 7 (17.9%) | Ref | Ref | Ref | Ref |
| Good | 959 (94.7%) | 32 (82.1%) | 0.66 (0.24-2.03) | 0.68 (0.24-2.11) | 0.66 (0.24-2.09) | 0.67 (0.24-2.12) |
| **Self-perceived health status** |  |  |  |  |  |  |
| General | 186 (18.4%) | 19 (48.7%) | Ref | Ref | Ref | Ref |
| Good | 813 (80.3%) | 15 (38.5%) | **0.16 (0.07-0.36)***** | **0.17 (0.08-0.39)***** | **0.17 (0.08-0.38)***** | **0.17 (0.08-0.41)***** |
| Poor | 14 (1.4%) | 5 (12.8%) | 4.05 (0.94-16.19) | 3.83 (0.88-15.46) | 3.94 (0.88-16.26) | 3.85 (0.86-15.98) |
| **Family members’ SARS-CoV-2 infection status** (Yes) | 500 (49.4%) | 30 (76.9%) |  | 2.85 (0.91-10.17) |  | 2.41 (0.80-8.20) |
| **Concerned about the impact of COVID** **infection on health** (Yes) | 549 (54.2%) | 29 (74.4%) |  |  | 1.76 (0.53-6.00) | 1.60 (0.49-5.36) |
| **Concerned about the crowding out of health care resources** (Yes) | 486 (48.0%) | 27 (69.2%) |  |  | 1.42 (0.52-4.36) | 1.37 (0.51-4.13) |
| **Prepared medication related to the SARS-CoV-2 infection in advance** (Yes) | 523 (51.6%) | 25 (64.1%) |  |  | 1.54 (0.69-3.59) | 1.63 (0.73-3.78) |
| **COVID-19 diagnosis** (Yes) | 590 (58.2%) | 30 (76.9%) | **2.63 (1.09-6.91)*** | 1.26 (0.37-4.43) | 1.52 (0.59-4.36) | 0.88 (0.27-3.09) |
| ***Adjusted R2*** |  |  | 0.202 | 0.212 | 0.219 | 0.226 |
| ***ΔR2*** |  |  |  | 0.01 | 0.017 | 0.024 |

Note: **p*<0.05, ***p*<0.01, ****p*<0.001 (two-tailed).

Supplemental table 4 Results of hierarchical regression analyses for **physical symptoms**

| **Variables** | **Overall**  **(N=1013)**  **(n, %)** | **Cases**  **(n=26, 2.6%)**  **[n, (%)]** | **Model 1** | **Model 2** | **Model 3** | **Model 4** |
| --- | --- | --- | --- | --- | --- | --- |
| **Age** years | 32.0 (0.30) | 32.0 (0.00) | 0.79 (0.19-1.86) | 0.80 (0.20-1.81) | 0.68 (0.14-1.83) | 0.69 (0.15-1.80) |
| **Weight (kg)** | 62.3 (8.56) | 58.3 (10.4) | **0.93 (0.88-0.98)*** | **0.94 (0.86-0.99)*** | **0.94 (0.88-0.98)*** | **0.94 (0.86-0.99)*** |
| **Pregnancy and childbirth status** |  |  |  |  |  |  |
| Pregnant (36 weeks or less) | 491 (48.5%) | 10 (38.5%) | Ref | Ref | Ref | Ref |
| Pregnant (> 36 weeks) | 206 (20.3%) | 4 (15.4%) | 1.34 (0.32-4.72) | 1.18 (0.28-4.22) | 1.56 (0.37-5.73) | 1.34 (0.31-4.95) |
| Postpartum (42 days or less) | 132 (13.0%) | 2 (7.7%) | 0.55 (0.07-2.49) | 0.44 (0.06-2.07) | 0.58 (0.08-2.67) | 0.45 (0.06-2.20) |
| Postpartum(> 42 days) | 184 (18.2%) | 10 (38.5%) | 1.17 (0.39-3.36) | 1.02 (0.34-2.97) | 1.28 (0.42-3.78) | 1.10 (0.35-3.33) |
| **Number of Child(ren)** |  |  |  |  |  |  |
| One | 662 (65.4%) | 22 (84.6%) | Ref | Ref | Ref | Ref |
| Two or more | 351 (34.6%) | 4 (15.4%) | 0.34 (0.09-1.06) | 0.34 (0.09-1.05) | 0.31 (0.08-0.98) | 0.31 (0.08-0.99) |
| **Monthly family income (CNY)** |  |  |  |  |  |  |
| 5,000-10,000 | 440 (43.4%) | 12 (46.2%) | Ref | Ref | Ref | Ref |
| <5,000 | 239 (23.6%) | 3 (11.5%) | 0.74 (0.15-2.74) | 0.91 (0.18-3.48) | 0.89 (0.18-3.40) | 1.05 (0.21-4.06) |
| > 10,000 | 334 (33.0%) | 11 (42.3%) | 0.56 (0.21-1.47) | 0.60 (0.22-1.59) | 0.50 (0.18-1.37) | 0.54 (0.19-1.50) |
| **Educational level** |  |  |  |  |  |  |
| Middle school or below | 238 (23.5%) | 2 (7.7%) | Ref | Ref | Ref | Ref |
| College or above | 775 (76.5%) | 24 (92.4%) | 0.70 (0.14-5.56) | 0.68 (0.13-5.40) | 0.85 (0.16-6.97) | 0.81 (0.15-6.66) |
| **Employment status** |  |  |  |  |  |  |
| Unemployed | 115 (11.4%) | 3 (11.5%) | Ref | Ref | Ref | Ref |
| Other | 898 (88.6%) | 23 (88.5%) | 1.60 (0.43-8.06) | 1.70 (0.46-8.61) | 1.43 (0.39-7.17) | 1.49 (0.40-7.56) |
| **Partner’s educational level** |  |  |  |  |  |  |
| Middle school or below | 236 (23.3%) | 1 (3.8%) | Ref | Ref | Ref | Ref |
| College or above | 777 (76.7%) | 25 (96.2%) | 4.40 (0.69-8.86) | 4.39 (0.70-8.74) | 3.85 (0.58-7.99) | 3.82 (0.59-7.81) |
| **Relationship with the partner** |  |  |  |  |  |  |
| General | 54 (5.3%) | 8 (30.8%) | Ref | Ref | Ref | Ref |
| Good | 959 (94.7%) | 18 (69.2%) | **0.27 (0.09-0.83)*** | **0.27 (0.09-0.86)*** | **0.26 (0.09-0.85)*** | **0.27 (0.09-0.87)*** |
| **Self-perceived health status** |  |  |  |  |  |  |
| General | 186 (18.4%) | 15 (57.7%) | Ref | Ref | Ref | Ref |
| Good | 813 (80.3%) | 7 (26.9%) | **0.15 (0.05-0.41)***** | **0.17 (0.06-0.47)***** | **0.16 (0.05-0.45)***** | **0.19 (0.06-0.53)**** |
| Poor | 14 (1.4%) | 4 (15.4%) | **5.45 (1.01-29.17)*** | 5.00 (0.93-27.08) | **6.15 (1.11-34.22)*** | **5.67 (1.01-32.27)*** |
| **Family members with SARS-CoV-2 infection status** (Yes) | 500 (49.4%) | 24 (92.3%) |  | 4.97 (1.01-41.68) |  | 4.07 (0.87-3.27) |
| **Concerned about the impact of COVID infection on health** (Yes) | 549 (54.2%) | 23 (88.5%) |  |  | 4.78 (0.97-29.19) | 3.96 (0.84-23.81) |
| **Concerned about the crowding out of health care resources** (Yes) | 486 (48.0%) | 19 (73.1%) |  |  | 0.62 (0.20-2.22) | 0.67 (0.22-2.34) |
| **Prepared medication related to the SARS-CoV-2 infection in advance** (Yes) | 523 (51.6%) | 18 (69.2%) |  |  | 1.15 (0.41-3.53) | 1.15 (0.41-3.55) |
| **COVID-19 diagnosis** (Yes) | 590 (58.2%) | 24 (92.3%) | **6.45 (1.67-43.3)*** | 2.38 (0.45-19.6) | 3.79 (0.89-27.1) | 1.82 (0.35-14.7) |
| ***Adjusted R2*** |  |  | 0.302 | 0.319 | 0.320 | 0.332 |
| ***ΔR2*** |  |  |  | 0.017 | 0.018 | 0.03 |

Note: Partner’s employment status was not adjusted for in the models for physical symptoms, since there was only few cases with physical symptoms.

**p*<0.05, ***p*<0.01, ****p*<0.001 (two-tailed).
